# Supplementary material for: Phaeosphaeridiols A–C: Three New Compounds from Undescribed Phaeosphaeriaceae sp. SGSF723
Source: MDPI journal article supplement (doi:10.3390/jof8111190), 2022-11-11
Supplement: s1 [file s1]

Supporting Information for

## **Phaeosphaeridiols A–C: Three New Compounds from Undescribed Phaeosphaeriaceae sp. SGSF723**

**Lu Si <sup>1,†</sup>, Yao Liu <sup>1,†</sup>, Tingting Du <sup>1,†</sup>, Wei Meng <sup>2</sup>, and Lijian Xu <sup>1,\*</sup>**

<sup>1</sup> College of Advanced Agriculture and Ecological Environment, Heilongjiang University, Harbin 150080, China

<sup>2</sup> College of Life Science, Northeast Forestry University, Harbin 150040, China

\* Correspondence: xulijian@hlju.edu.cn or xulijiancau@gmail.com

† These authors contributed equally to this work.

**Table S1.** Compounds from different genera (*Ampelomyces*, *Edenia*, *Ophiobolus*, and *Setophoma*) in Phaeosphaeriaceae.

| Genus              | Chemical name                                                                                            | Molecular Formula                                              | References |
|--------------------|----------------------------------------------------------------------------------------------------------|----------------------------------------------------------------|------------|
| <i>Ampelomyces</i> | Altersolanol A                                                                                           | C <sub>16</sub> H <sub>16</sub> O <sub>8</sub>                 | [13]       |
|                    | 8-Hydroxy-3-(2-hydroxypropyl)-6-methoxy-1H-2-benzopyran-1-one; (S)-form, 3'-Hydroxy, O-de-Me             | C <sub>12</sub> H <sub>12</sub> O <sub>6</sub>                 | [13]       |
|                    | 8-Hydroxy-3-(2-hydroxypropyl)-6-methoxy-1H-2-benzopyran-1-one; (S)-form, 3',3'-Dichloro, O-de-Me         | C <sub>12</sub> H <sub>10</sub> Cl <sub>2</sub> O <sub>5</sub> | [13]       |
|                    | 8-Hydroxy-3-(2-hydroxypropyl)-6-methoxy-1H-2-benzopyran-1-one; (S)-form                                  | C <sub>13</sub> H <sub>14</sub> O <sub>5</sub>                 | [13]       |
|                    | 4-Hydroxy-6-(2-hydroxypropyl)-3-methyl-2H-pyran-2-one; (ξ)-form, 2'-Ac (Ampelopyrone)                    | C <sub>11</sub> H <sub>14</sub> O <sub>5</sub>                 | [13]       |
|                    | Tetrahydroaltersolanol B; 1β,4β-Dihydroxy                                                                | C <sub>16</sub> H <sub>20</sub> O <sub>8</sub>                 | [13]       |
|                    | 1,2,6,8-Tetrahydroxy-3-methylanthraquinone; 6-Me ether, 2-O-sulfate                                      | C <sub>16</sub> H <sub>12</sub> O <sub>9</sub> S               | [13]       |
|                    | 1,3,7-Trihydroxy-3-methylanthraquinone; 3-Me ether, 7-O-sulfate                                          | C <sub>16</sub> H <sub>12</sub> O <sub>8</sub> S               | [13]       |
|                    | 2,5-Dihydroxy-3-mercaptobenzyl alcohol; S-Me,S-oxide                                                     | C <sub>8</sub> H <sub>10</sub> O <sub>4</sub> S                | [14]       |
|                    | 2,3-Epoxy-5-methyl-1,4-cyclohexanediol; (1R,2R,3S,4R,5R)-form                                            | C <sub>7</sub> H <sub>12</sub> O <sub>3</sub>                  | [14]       |
|                    | 4-Hydroxy-6-methyl-2-cyclohexen-1-one; (4R,6S)-form                                                      | C <sub>7</sub> H <sub>10</sub> O <sub>2</sub>                  | [14]       |
|                    | 5-Methyl-1,2,3,4-cyclohexanetetrol; (1S,2R,3R,4S,5S)-form, 2-O-(2-Hydroxy-6-methylbenzoyl) (Ampelomin G) | C <sub>15</sub> H <sub>20</sub> O <sub>6</sub>                 | [14]       |
|                    | 5-Methyl-1,2,4-cyclohexanetriol; (1R,2S,4R,5R)-form                                                      | C <sub>7</sub> H <sub>14</sub> O <sub>3</sub>                  | [14]       |
|                    | 5-Methyl-1,2,4-cyclohexanetriol; (1R,2S,4S,5R)-form                                                      | C <sub>7</sub> H <sub>14</sub> O <sub>3</sub>                  | [14]       |
|                    | 5-Methyl-1,2,4-cyclohexanetriol; (1S,2R,4R,5R)-form                                                      | C <sub>7</sub> H <sub>14</sub> O <sub>3</sub>                  | [14]       |
|                    | 5-Methyl-1,2,4-cyclohexanetriol; (1S,2S,4R,5S)-form                                                      | C <sub>7</sub> H <sub>14</sub> O <sub>3</sub>                  | [14]       |
| <i>Edenia</i>      | Palmarumycin CP <sub>1</sub> ; 2,3-Dihydro                                                               | C <sub>20</sub> H <sub>14</sub> O <sub>4</sub>                 | [15]       |
|                    | Palmarumycin CP <sub>1</sub> ; 2,3-Dihydro, 4α-alcohol, 4-Me ether                                       | C <sub>21</sub> H <sub>18</sub> O <sub>4</sub>                 | [15]       |
|                    | Preussomerin A; 2,3-Deepoxy, 2',3'-dihydro, 1,1'-diketone                                                | C <sub>20</sub> H <sub>14</sub> O <sub>6</sub>                 | [15]       |
|                    | Palmarumycin CP <sub>1</sub> ; 2,3-Dihydro, 8-hydroxy                                                    | C <sub>20</sub> H <sub>14</sub> O <sub>5</sub>                 | [15]       |
|                    | Palmarumycin CP <sub>1</sub> ; 2,3-Dihydro, 8-hydroxy, 4α-alcohol, 4-Me ether (Palmarumycin EG1)         | C <sub>21</sub> H <sub>18</sub> O <sub>5</sub>                 | [16]       |
|                    | Preussomerin A; 2,3-Deepoxy, 2',3'-dihydro, 3'α-hydroxy, 1,1'-diketone                                   | C <sub>20</sub> H <sub>14</sub> O <sub>7</sub>                 | [16]       |

|                   |                                                                                 |                                                 |      |
|-------------------|---------------------------------------------------------------------------------|-------------------------------------------------|------|
|                   | Preussomerin A; 2,3-Deepoxy, 2',3'-dihydro, 3' $\alpha$ -methoxy, 1,1'-diketone | C <sub>21</sub> H <sub>16</sub> O <sub>7</sub>  | [16] |
|                   | Preussomerin A; 2,3-Deepoxy, 1,1'-diketone                                      | C <sub>20</sub> H <sub>12</sub> O <sub>6</sub>  | [16] |
| <i>Ophiobolus</i> | Achaetolide                                                                     | C <sub>16</sub> H <sub>28</sub> O <sub>5</sub>  | [17] |
|                   | 7,18-Ophioboladien-3-ol; 3 $\alpha$ -form                                       | C <sub>25</sub> H <sub>42</sub> O               | [18] |
|                   | Ophiobolide A                                                                   | C <sub>16</sub> H <sub>30</sub> O <sub>6</sub>  | [19] |
|                   | Ophiobolide B                                                                   | C <sub>16</sub> H <sub>28</sub> O <sub>6</sub>  | [19] |
|                   | Ophiobolide C                                                                   | C <sub>16</sub> H <sub>28</sub> O <sub>6</sub>  | [19] |
|                   | Ophiobolin A                                                                    | C <sub>25</sub> H <sub>36</sub> O <sub>4</sub>  | [20] |
|                   | Vermisporin                                                                     | C <sub>25</sub> H <sub>37</sub> NO <sub>4</sub> | [21] |
| <i>Setophoma</i>  | Blennolide A; 3,4 $\alpha$ -Diepimer, 1-deoxy                                   | C <sub>16</sub> H <sub>16</sub> O <sub>6</sub>  | [22] |
|                   | Blennolide D; 3'-Deoxy                                                          | C <sub>16</sub> H <sub>16</sub> O <sub>7</sub>  | [22] |
|                   | Blennolide D; 2-Epimer, 3'-deoxy                                                | C <sub>16</sub> H <sub>16</sub> O <sub>7</sub>  | [22] |
|                   | Blennolide G; (-)-form                                                          | C <sub>32</sub> H <sub>30</sub> O <sub>14</sub> | [22] |
|                   | Blennolide G; (-)-form, 4'',5''-Diepimer                                        | C <sub>32</sub> H <sub>30</sub> O <sub>14</sub> | [22] |
|                   | Blennolide G; (-)-form, 4,4'',5''-Triepimer                                     | C <sub>32</sub> H <sub>30</sub> O <sub>14</sub> | [22] |
|                   | 3,4-Dihydro-6,8-dihydroxy-3-propyl-1H-2-benzopyran-1-one; (S)-form, 1'S-Hydroxy | C <sub>12</sub> H <sub>14</sub> O <sub>5</sub>  | [22] |
|                   | Penicillixanthone A                                                             | C <sub>32</sub> H <sub>30</sub> O <sub>14</sub> | [22] |
|                   | Lecanorin B; 2'-Demethyl                                                        | C <sub>16</sub> H <sub>16</sub> O <sub>5</sub>  | [23] |
|                   | Lecanorin B; 3-Demethyl                                                         | C <sub>16</sub> H <sub>16</sub> O <sub>5</sub>  | [23] |
|                   | Lecanorin B; 3-Demethyl, 4'-methyl                                              | C <sub>17</sub> H <sub>18</sub> O <sub>5</sub>  | [23] |

**Table S2.** Diameters (mm) of SGSF723 colonies on different media at different temperatures.

|       | OA          | PDA         | YMA         | MEA         |
|-------|-------------|-------------|-------------|-------------|
| 15 °C | 22.00±1.41c | 19.00±1.41b | 16.33±1.25a | 18.00±3.56a |
| 20 °C | 27.00±2.83b | 23.67±1.70a | 19.00±2.16a | 21.00±0.82a |
| 25 °C | 37.33±0.47a | 14.33±0.47c | 12.67±0.47b | 10.00±1.41b |
| 30 °C | 6.33±0.47d  | 4.00±0.82d  | 4.67±0.47c  | 5.00±0.00c  |

Note: The values mean average ± standard deviation. The letters “a–d” indicate significant differences (at the 0.05 level) in the diameters of colonies on the same media at different temperatures.

**Table S3.** Antimicrobial activities (diameters of inhibition zones) of crude extracts from different fungal strains.

| Strain No. | <i>R. solanacearum</i> |     |    | <i>X. oryzae</i> |    |    | <i>P. syringae</i> |    |   | <i>A. alternate</i> |     |   |
|------------|------------------------|-----|----|------------------|----|----|--------------------|----|---|---------------------|-----|---|
|            | Y                      | R   | A  | Y                | R  | A  | Y                  | R  | A | Y                   | R   | A |
| SGSF708    | —                      | —   | —  | +                | +  | +  | —                  | —  | — | —                   | +   | — |
| SGSF710    | —                      | —   | —  | —                | +  | +  | —                  | —  | — | —                   | —   | — |
| SGSF723    | —                      | +++ | ++ | —                | ++ | —  | —                  | ++ | + | —                   | +++ | — |
| SGSF726    | +                      | —   | —  | —                | —  | —  | —                  | —  | — | +                   | —   | — |
| SGSF728    | —                      | —   | ++ | —                | +  | ++ | —                  | —  | — | +                   | +   | — |

Note: “—” means no inhibition effect. “+” means the diameters of inhibition zones are 1–5 mm. “++” means the diameters of inhibition zones are 6–8 mm. “+++” means the diameters of inhibition zones are more than 8 mm. “Y”, “R”, and “A” represent YES, Rice, and PDA media, respectively.

**Table S4.** ITS sequence similarities with their closest known species of different fungal strains.

| Strain No. | Closest strain*                    | Similarity* | Coverage | Accession No.* |
|------------|------------------------------------|-------------|----------|----------------|
| SGSF708    | <i>Polyphilus sieberi</i>          | 94.21%      | 100%     | MG719688       |
| SGSF710    | <i>Coleophoma cylindrospora</i>    | 93.91%      | 97%      | MW192862       |
| SGSF723    | <i>Chaetosphaeronema achilleae</i> | 95.30%      | 97%      | ON754203       |
| SGSF726    | <i>Piniphoma wesendahlina</i>      | 93.43%      | 100%     | NR_163375      |
| SGSF728    | <i>Nematostoma parasiticum</i>     | 95.54%      | 100%     | MT547815       |

Note: “\*” means data from GenBank.

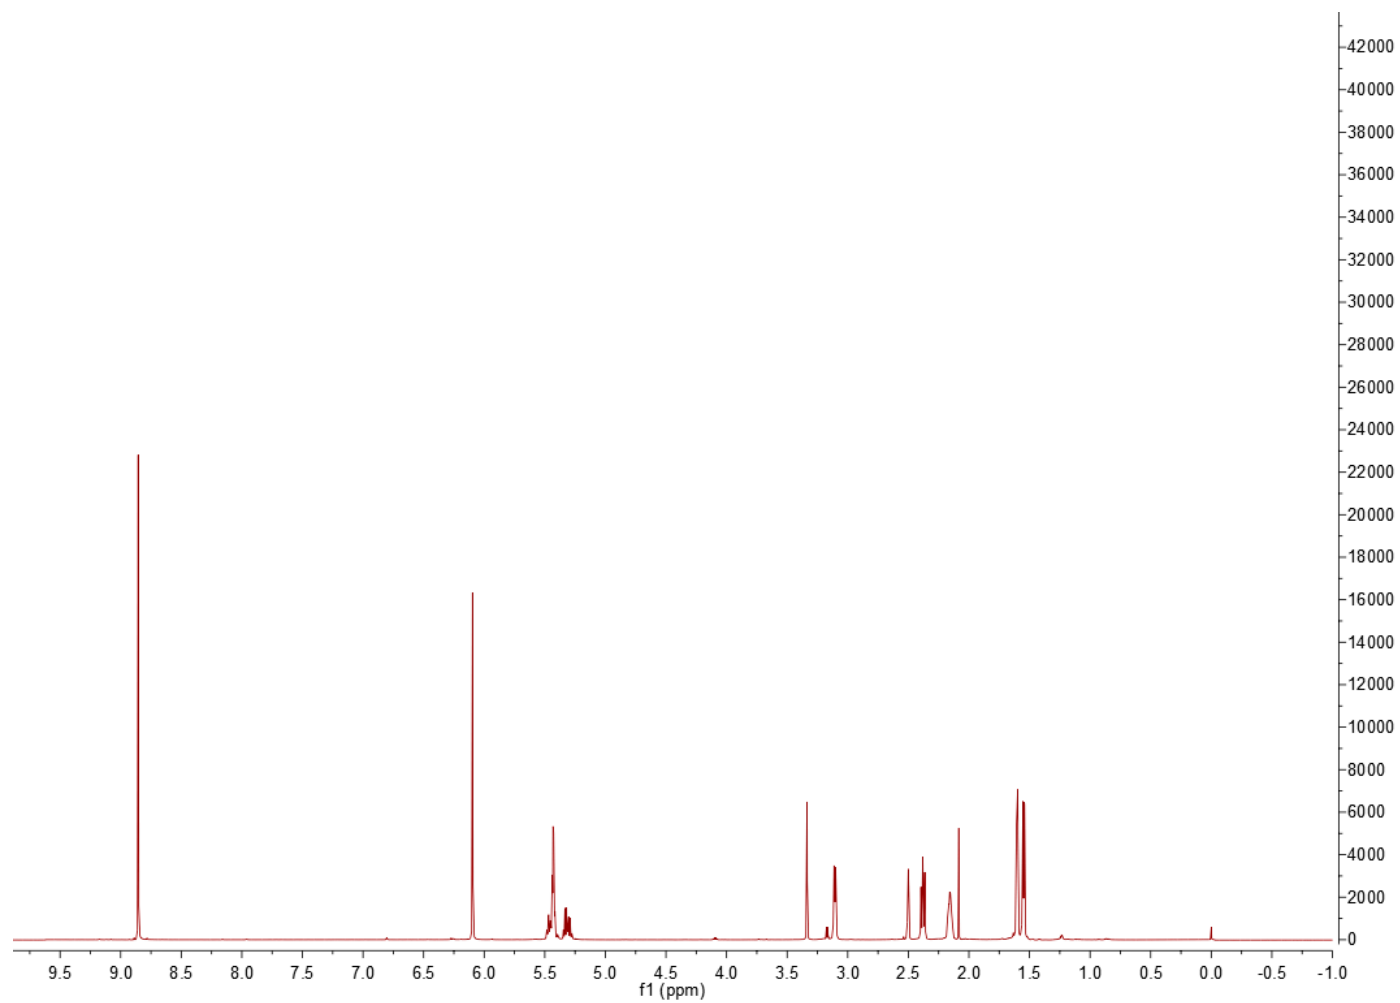

Figure S1:  $^1\text{H}$  NMR spectrum (500 MHz,  $\text{DMSO-d}_6$ ) of compound 1.

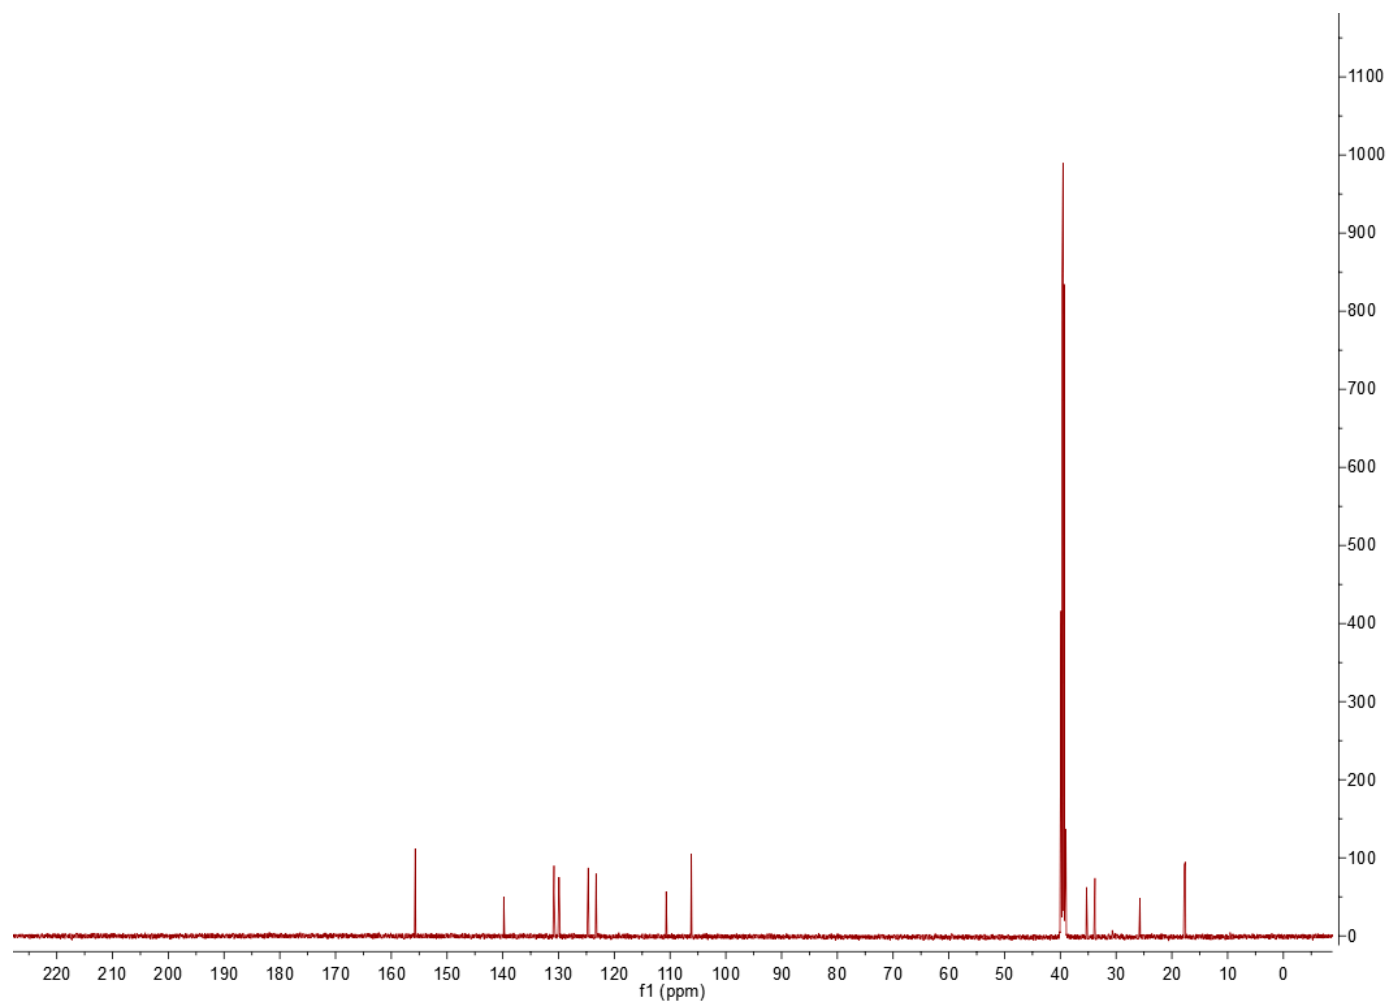

Figure S2:  $^{13}\text{C}$  NMR spectrum (125 MHz, DMSO- $d_6$ ) of compound 1.



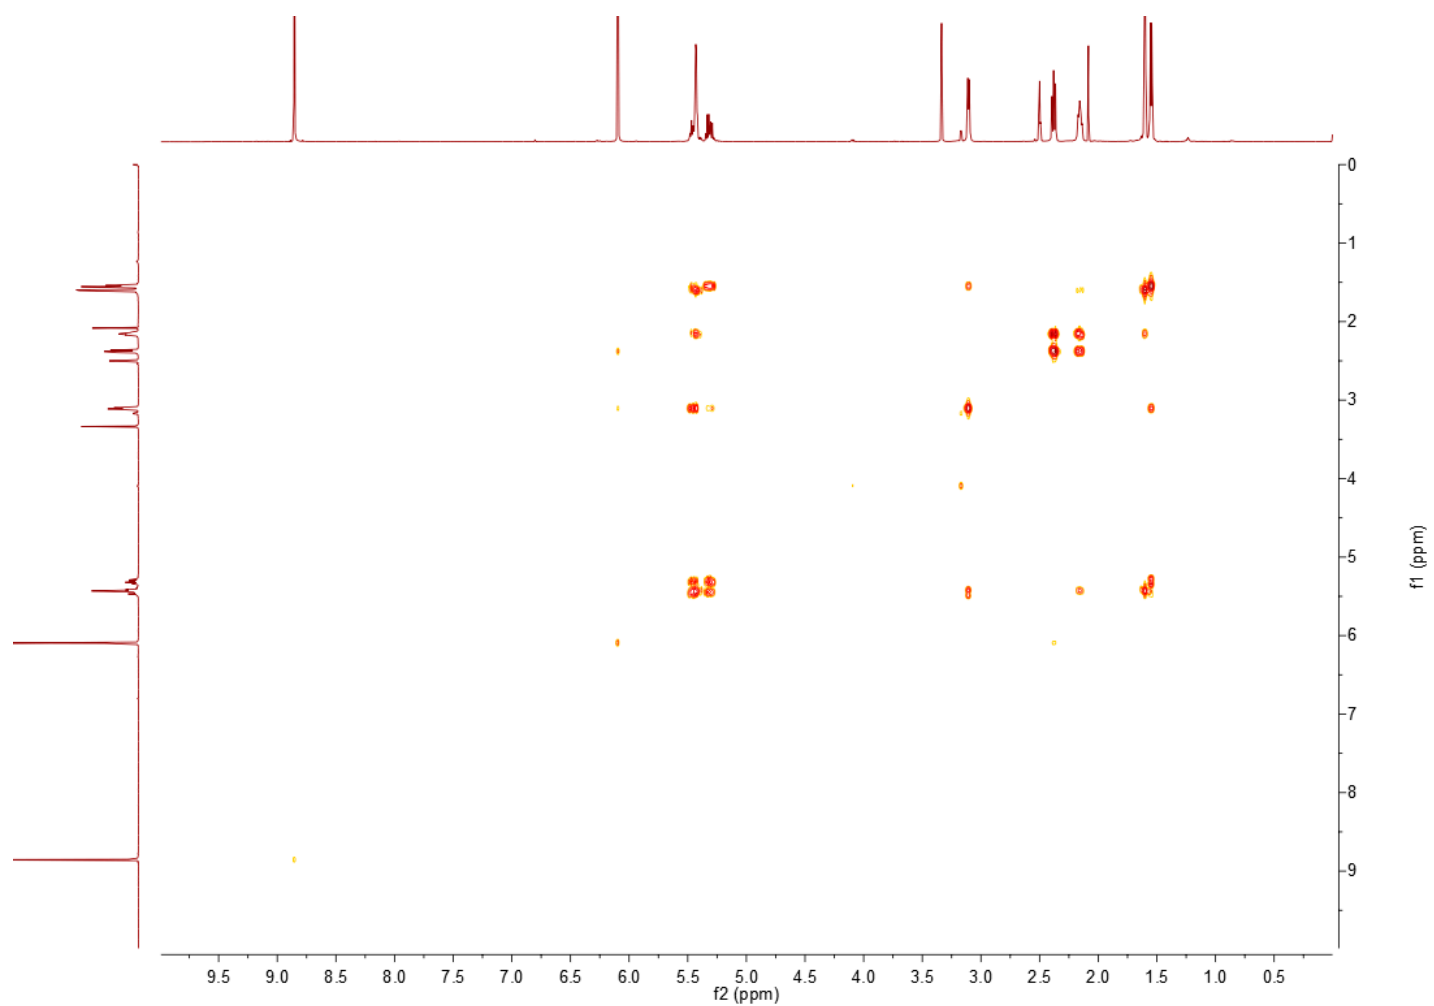

Figure S3: COSY NMR spectrum (500 MHz, DMSO -d) of compound 1.

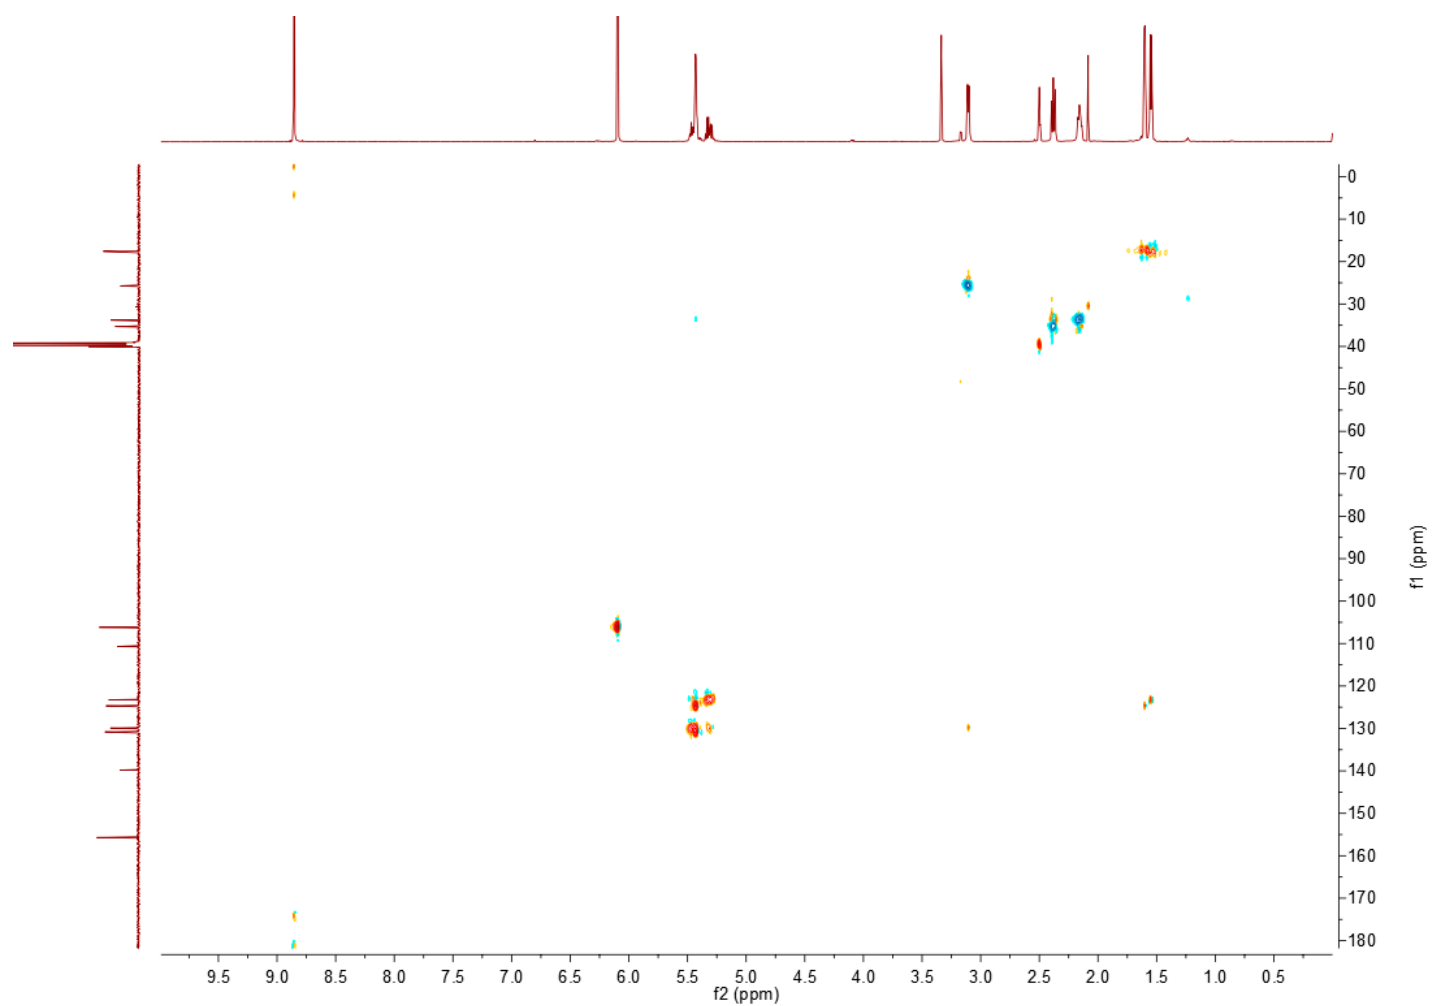

Figure S4: HSQC NMR spectrum (500 MHz, DMSO-d) of compound 1.

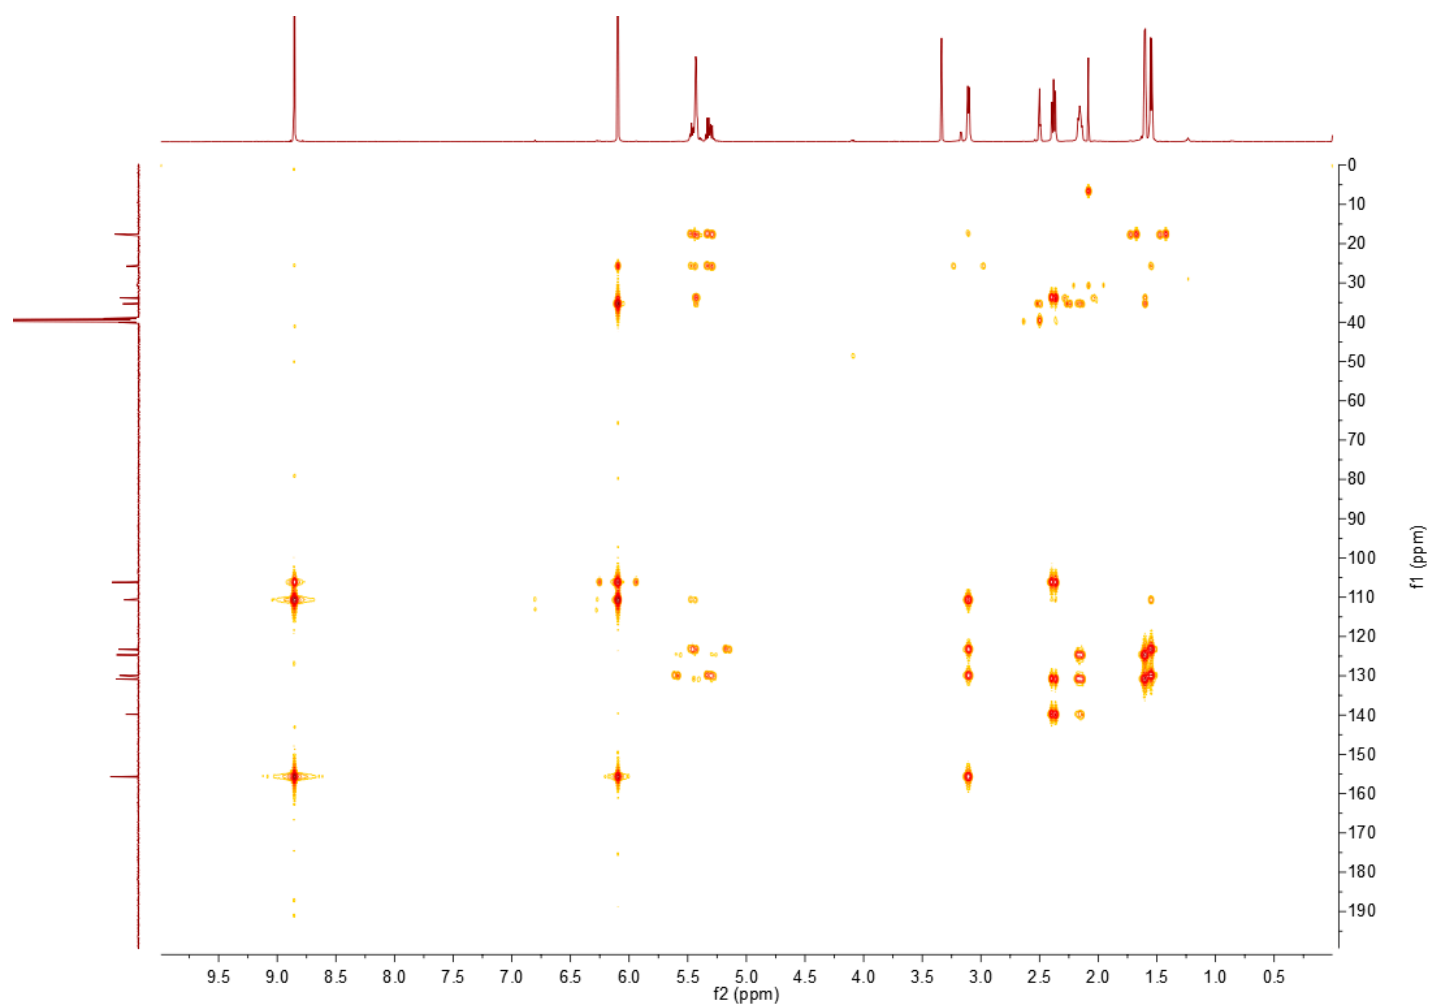

Figure S5: HMBC NMR spectrum (500 MHz, DMSO-d) of compound 1.

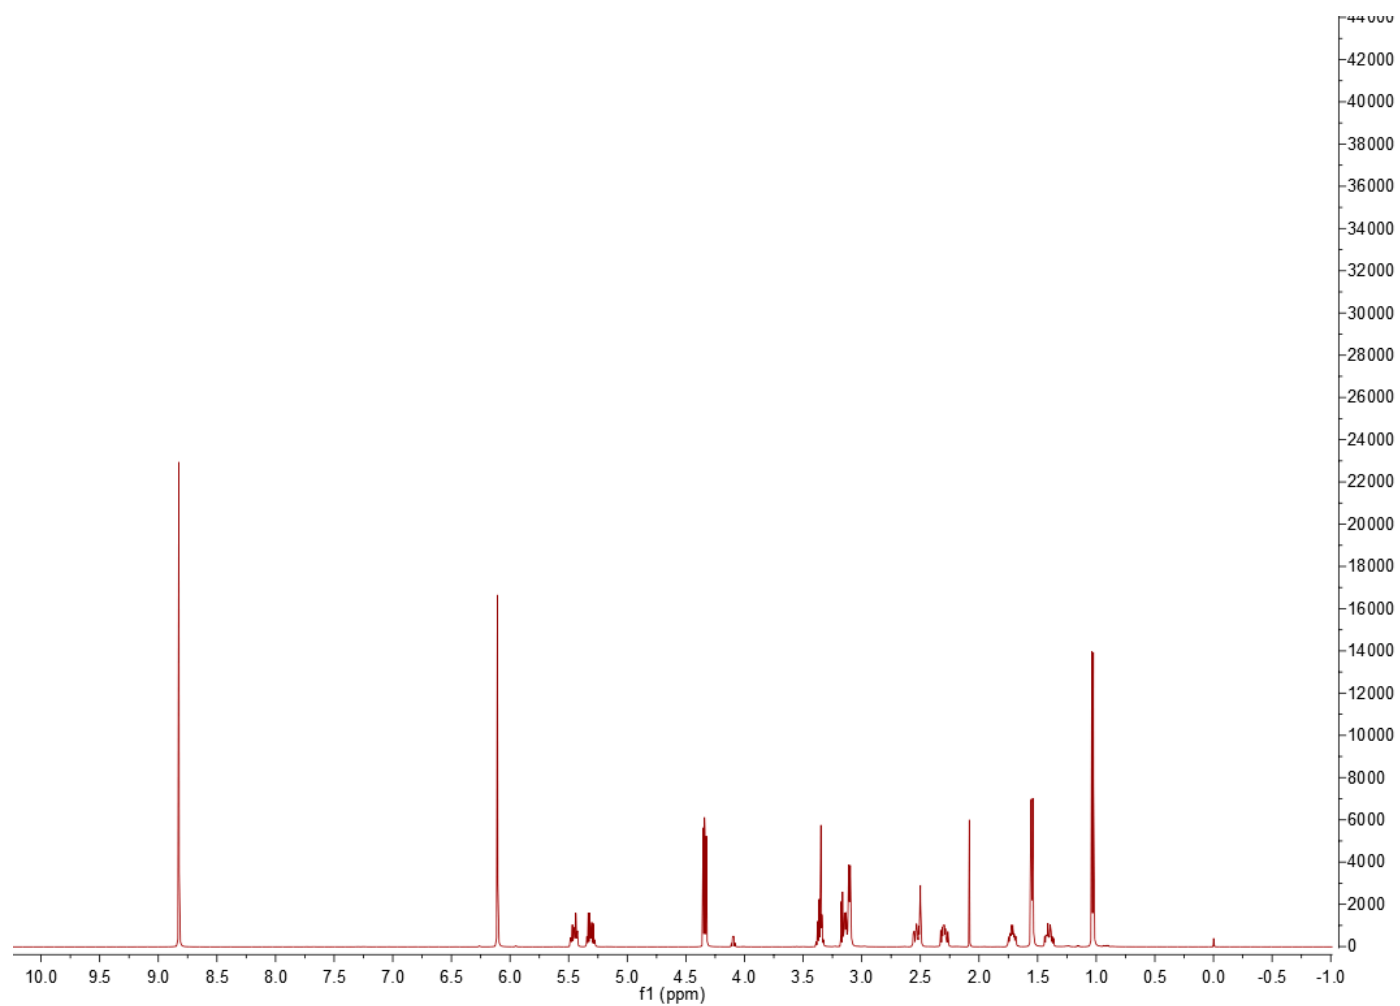

Figure S6:  $^1\text{H}$  NMR spectrum (500 MHz, DMSO- $d_6$ ) of compound 2.

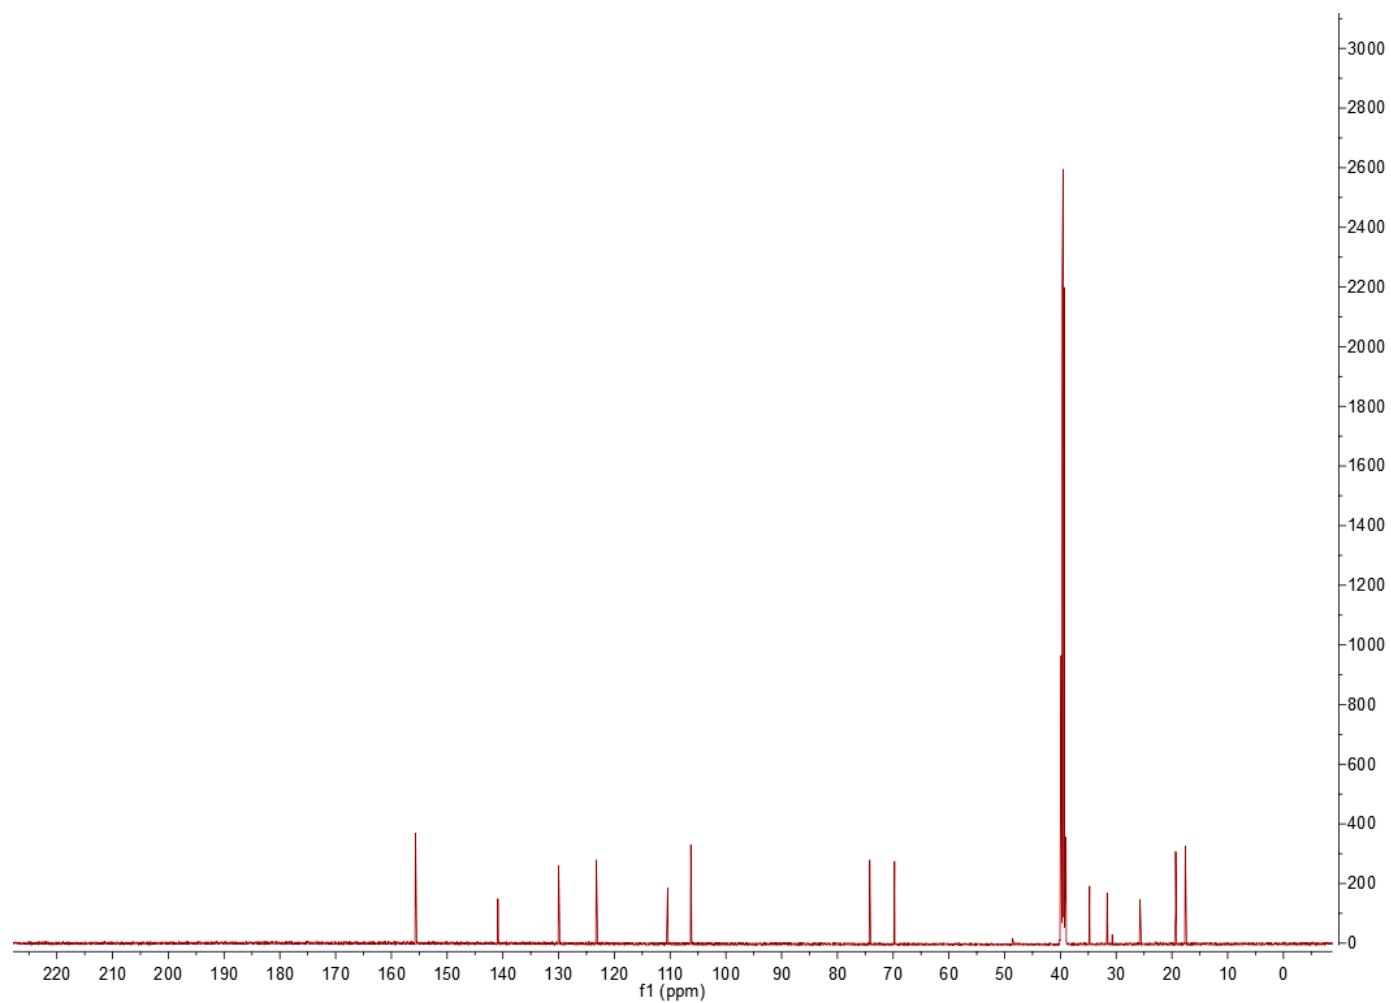

Figure S7:  $^{13}\text{C}$  NMR spectrum (125 MHz, DMSO-d) of compound 2.

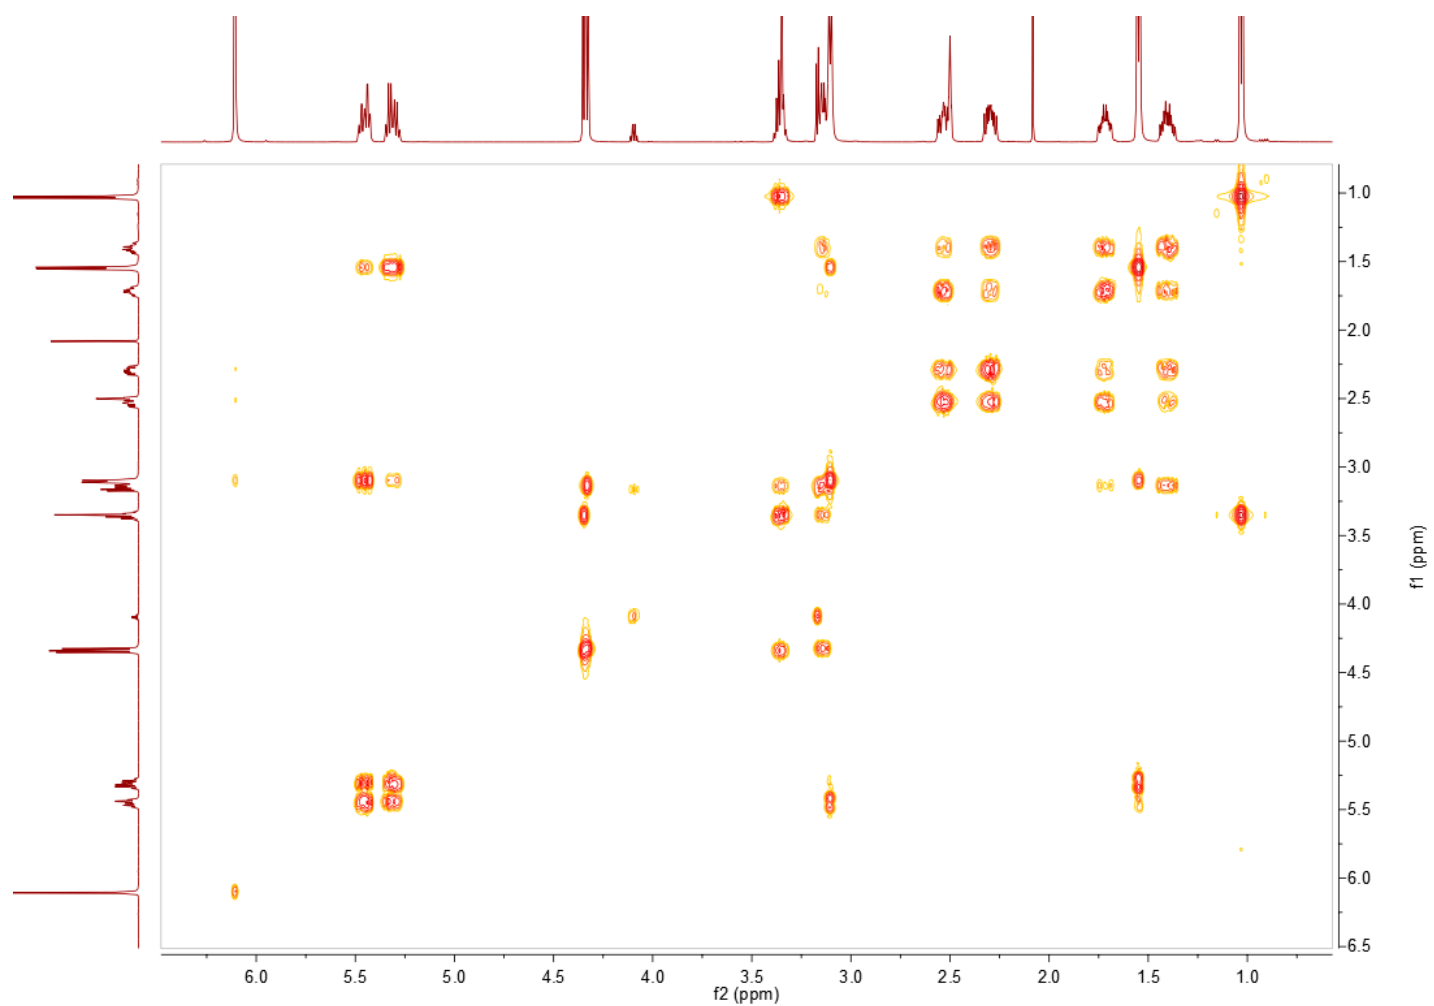

Figure S8: COSY NMR spectrum (500 MHz, DMSO -d) of compound 2.

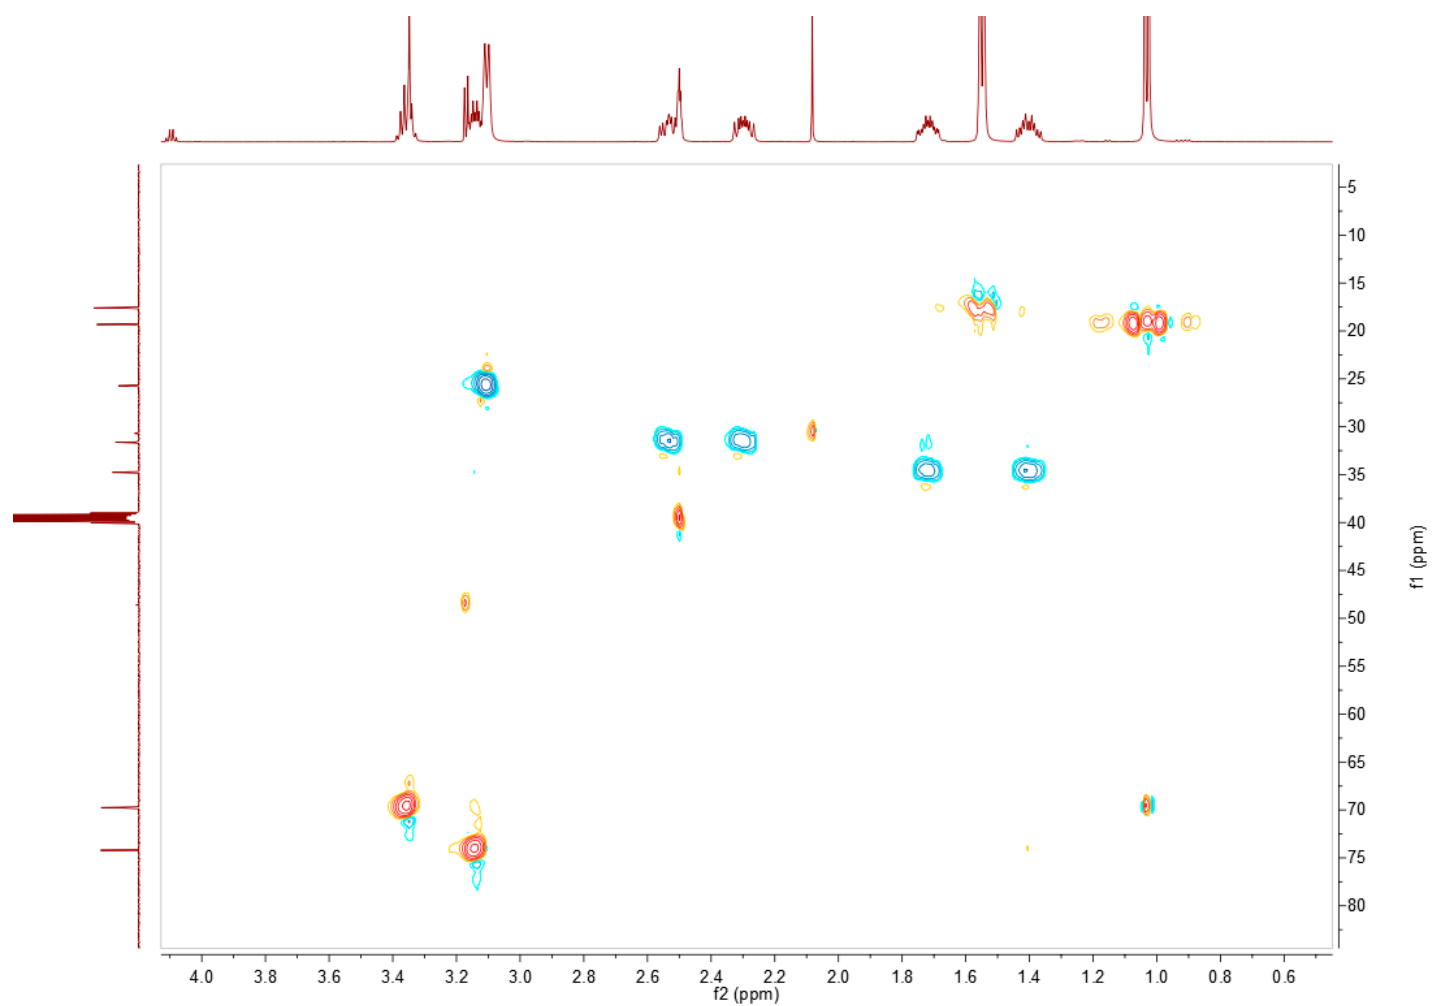

Figure S9: HSQC NMR spectrum (500 MHz, DMSO-d) of compound 2.

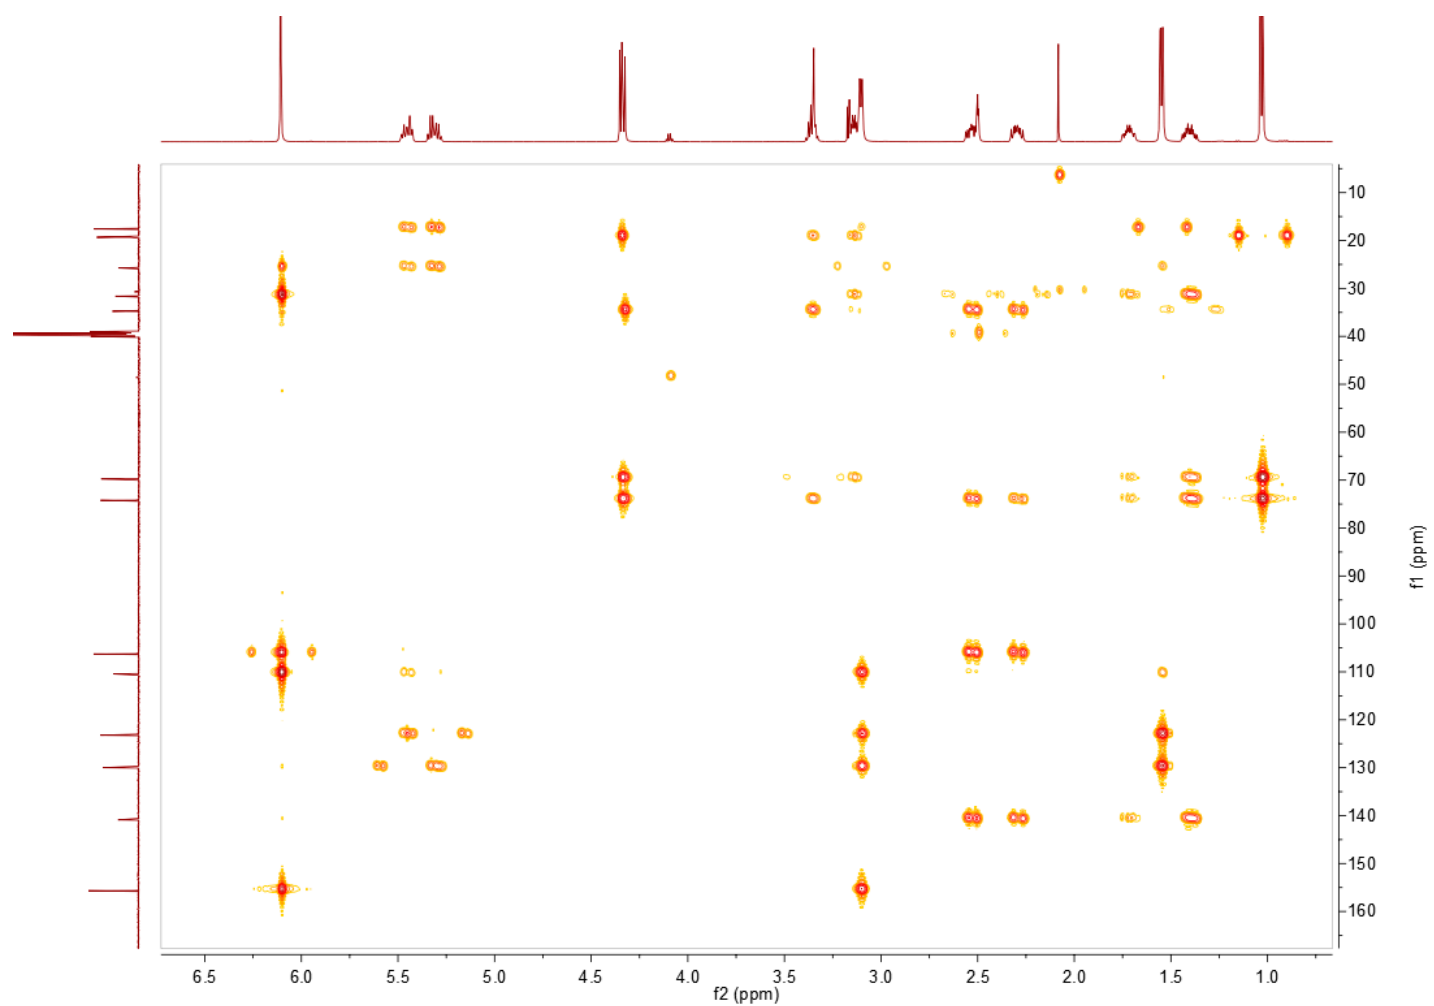

Figure S10: HMBC NMR spectrum (500 MHz, DMSO-d) of compound 2.



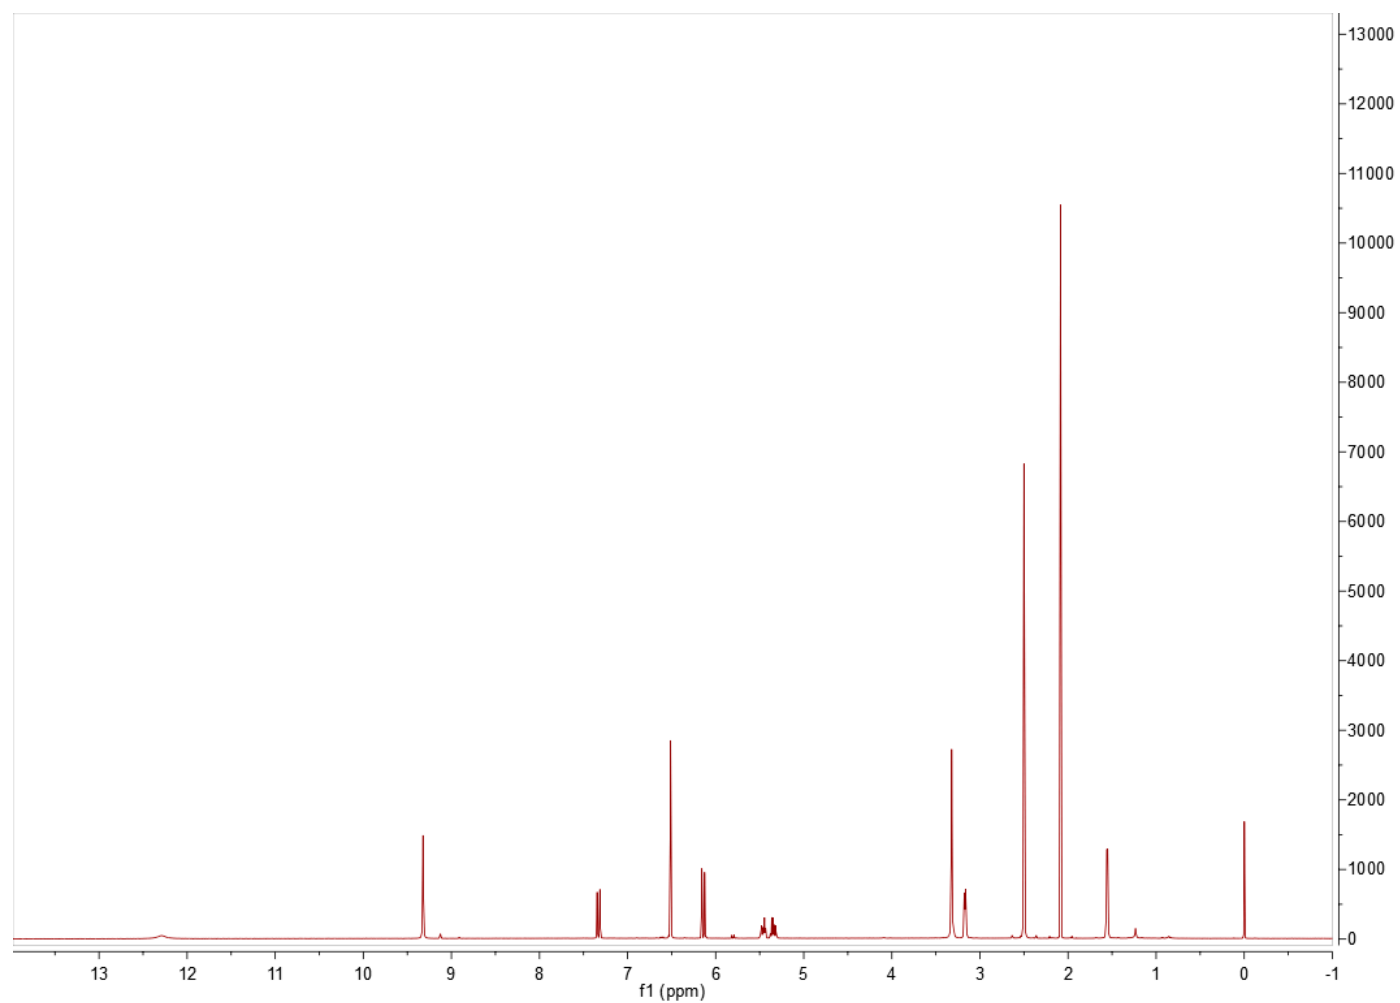

Figure S11:  $^1\text{H}$  NMR spectrum (500 MHz, DMSO- $d_6$ ) of compound 3.

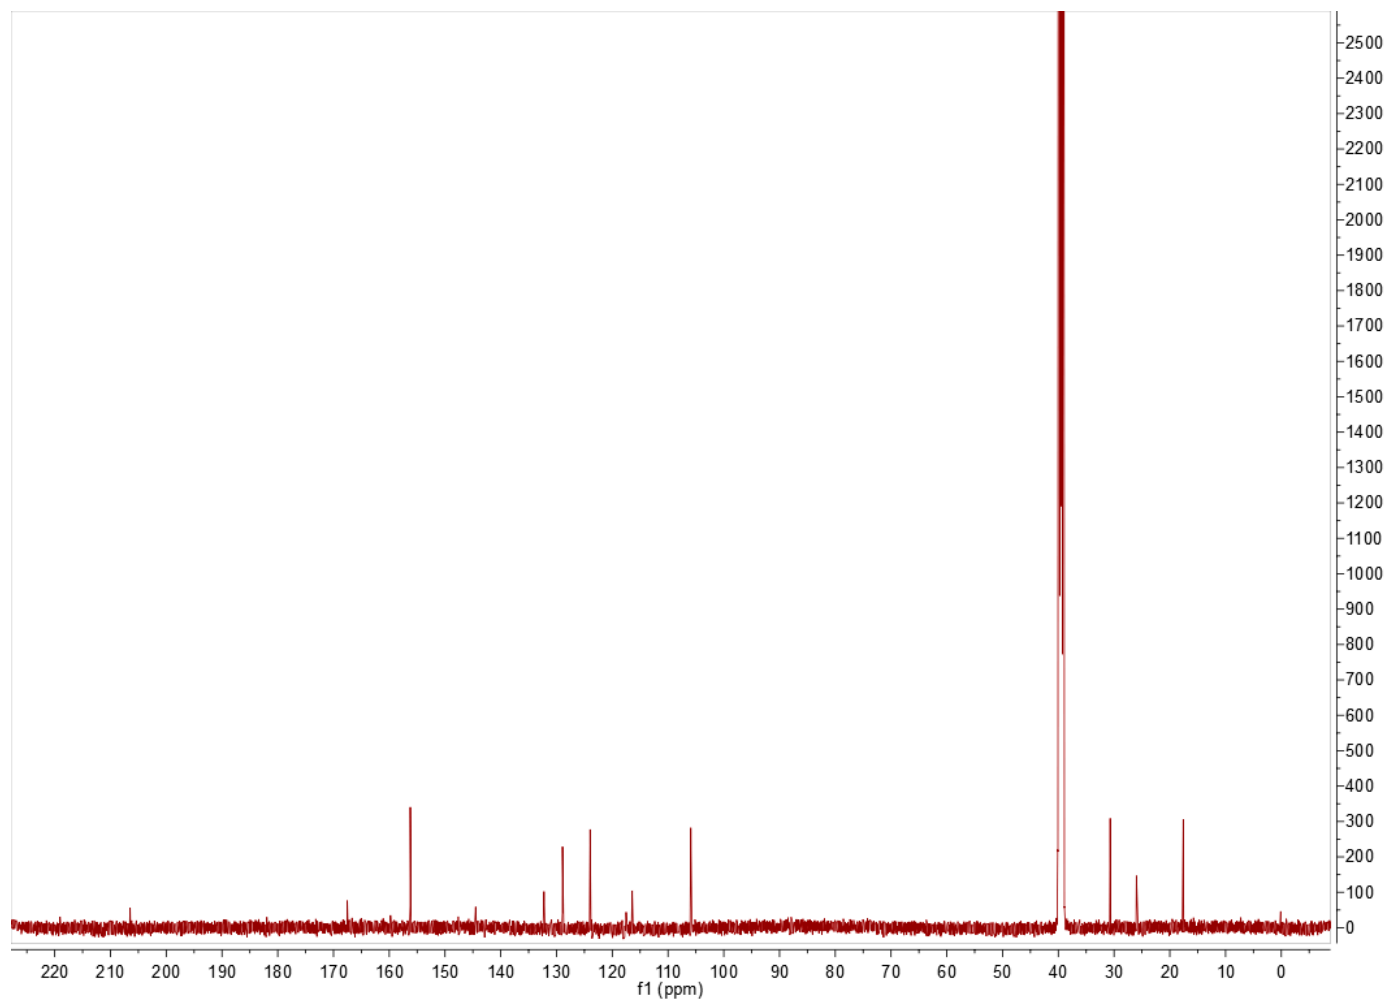

Figure S12:  $^{13}\text{C}$  NMR spectrum (125 MHz, DMSO-d) of compound 3.

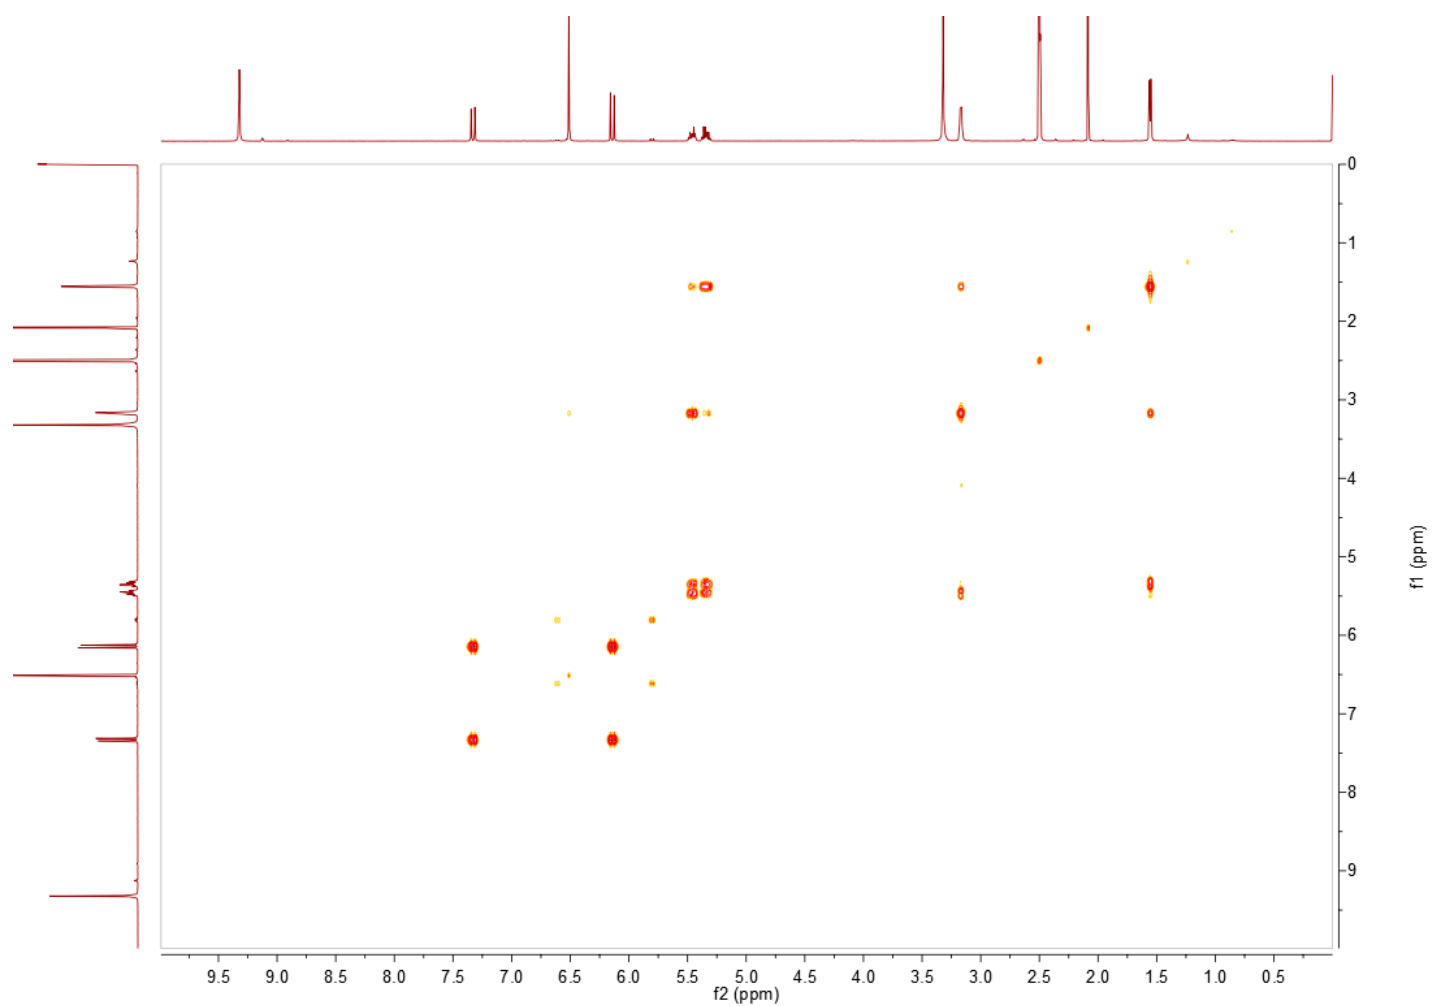

Figure S13: COSY NMR spectrum (500 MHz, DMSO -d) of compound 3.

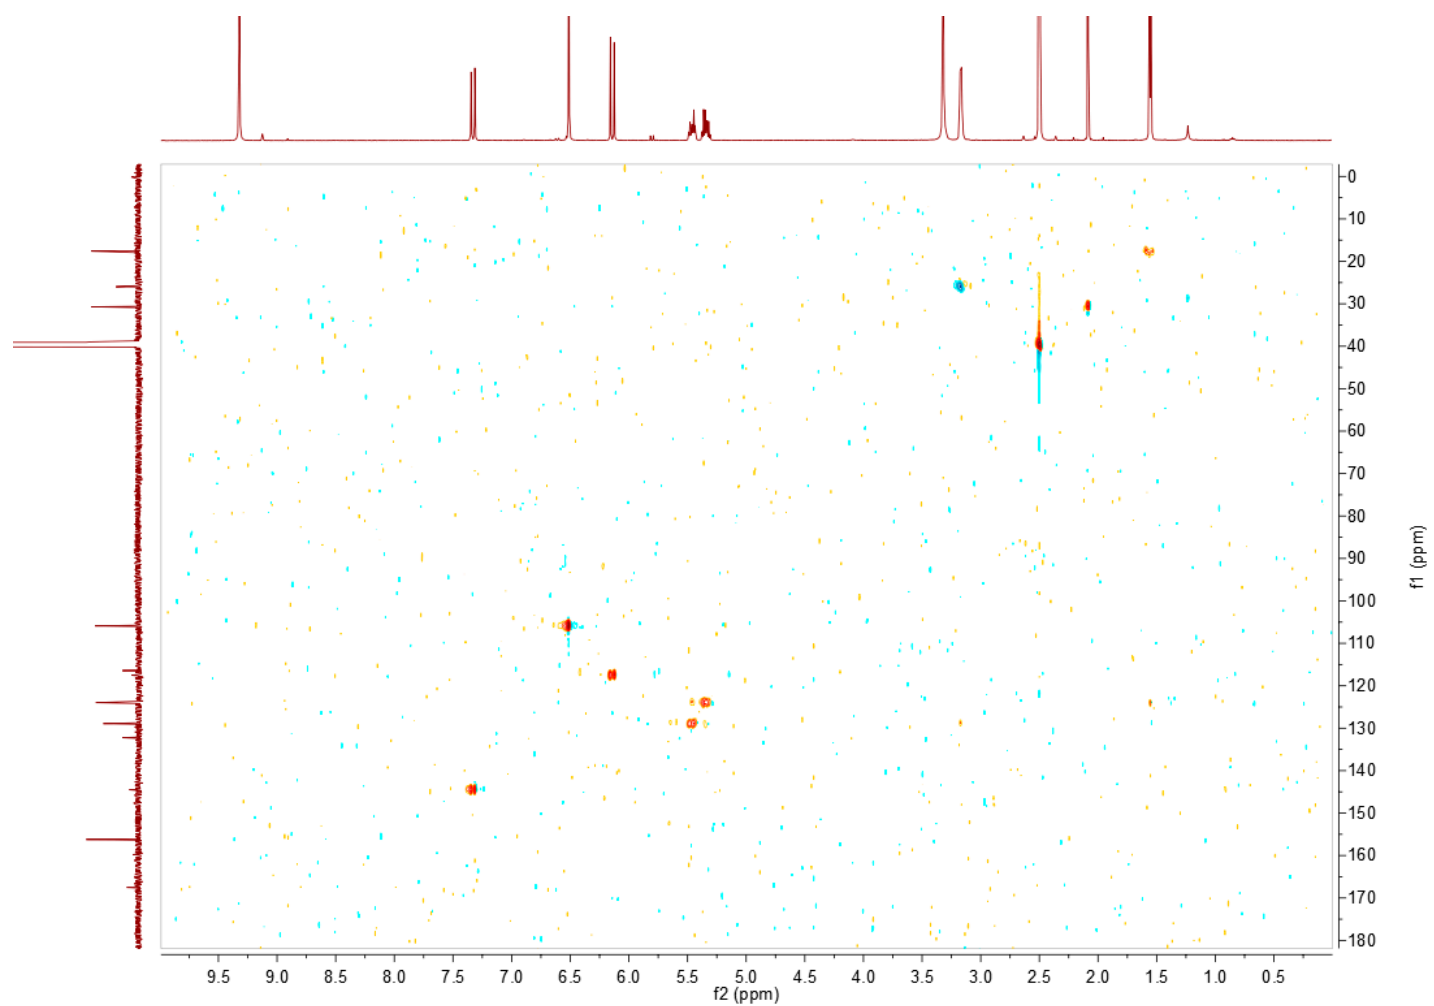

Figure S14: HSQC NMR spectrum (500 MHz, DMSO-d) of compound 3.

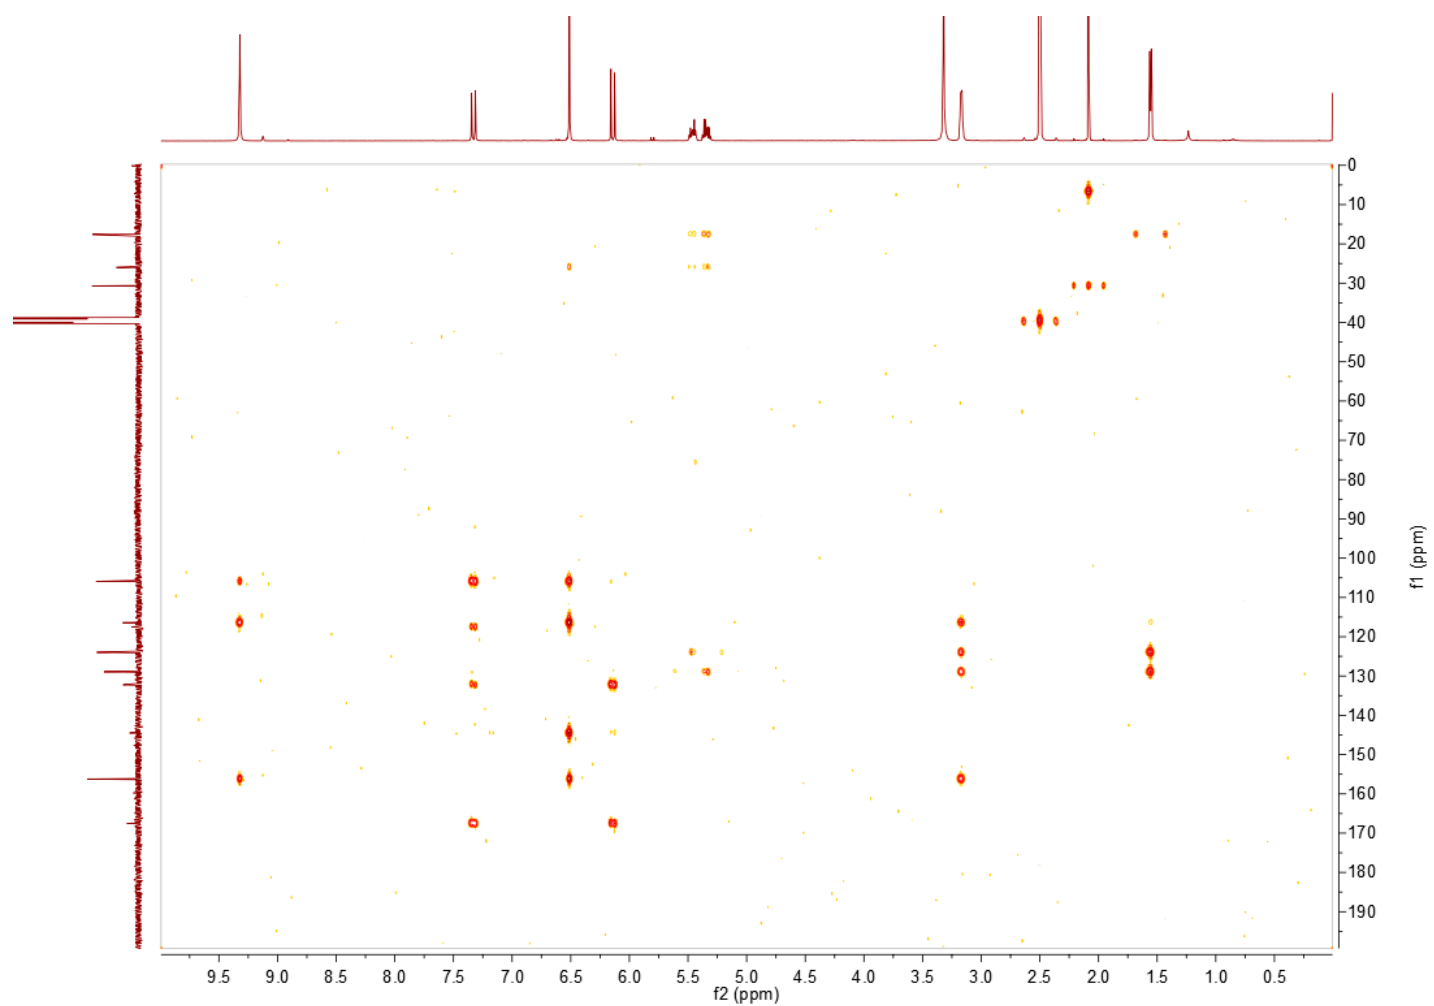

Figure S15: HMBC NMR spectrum (500 MHz, DMSO-d) of compound 3.

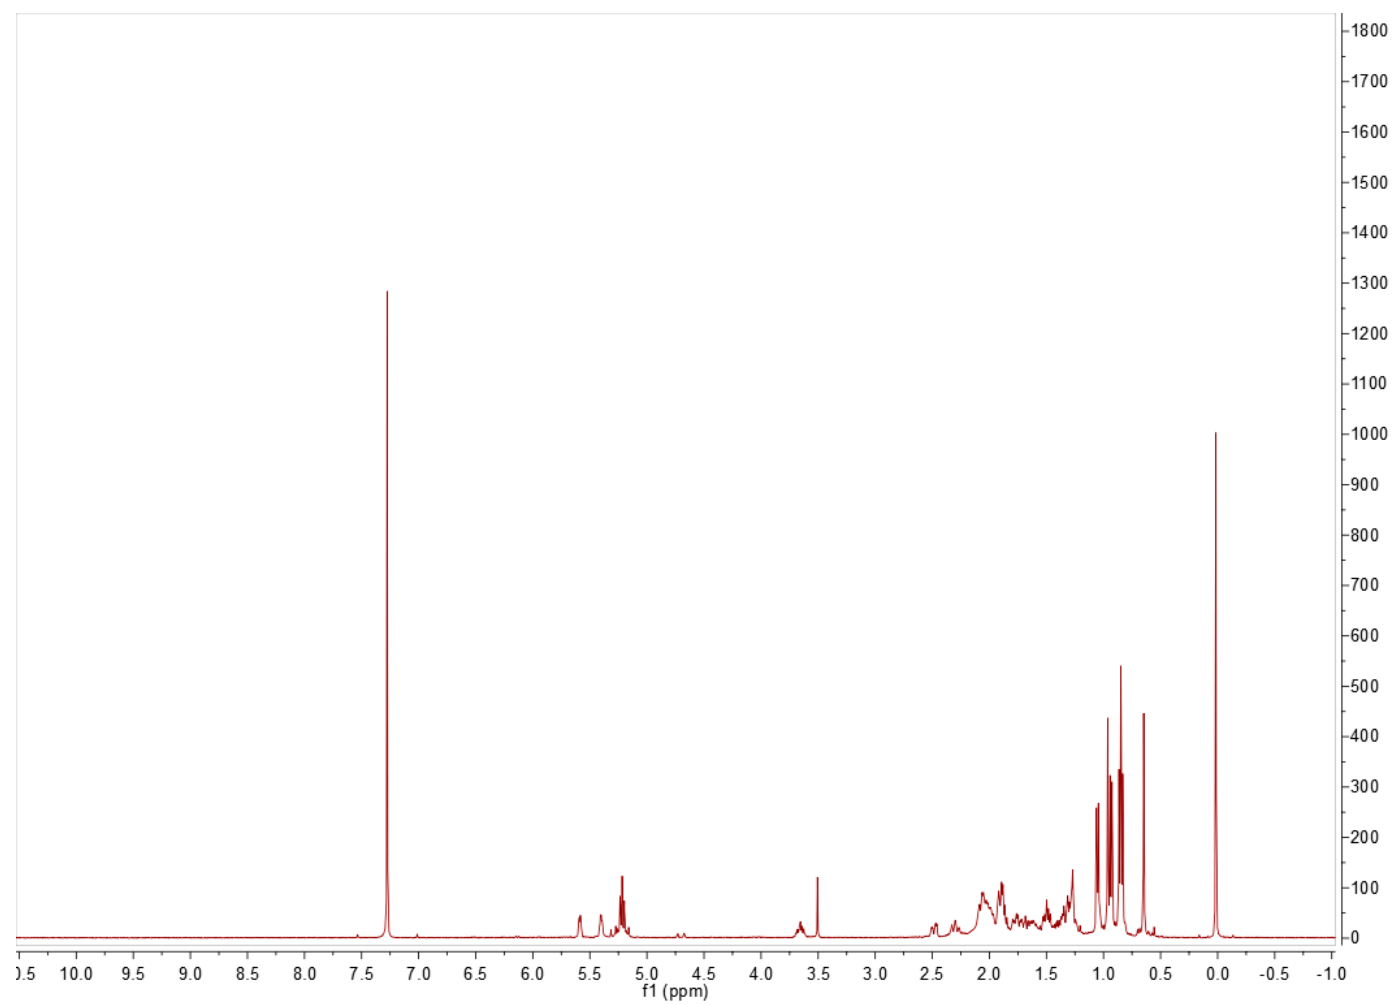

Figure S16:  $^1\text{H}$  NMR spectrum (400 MHz, Chloroform-d) of compound 4.

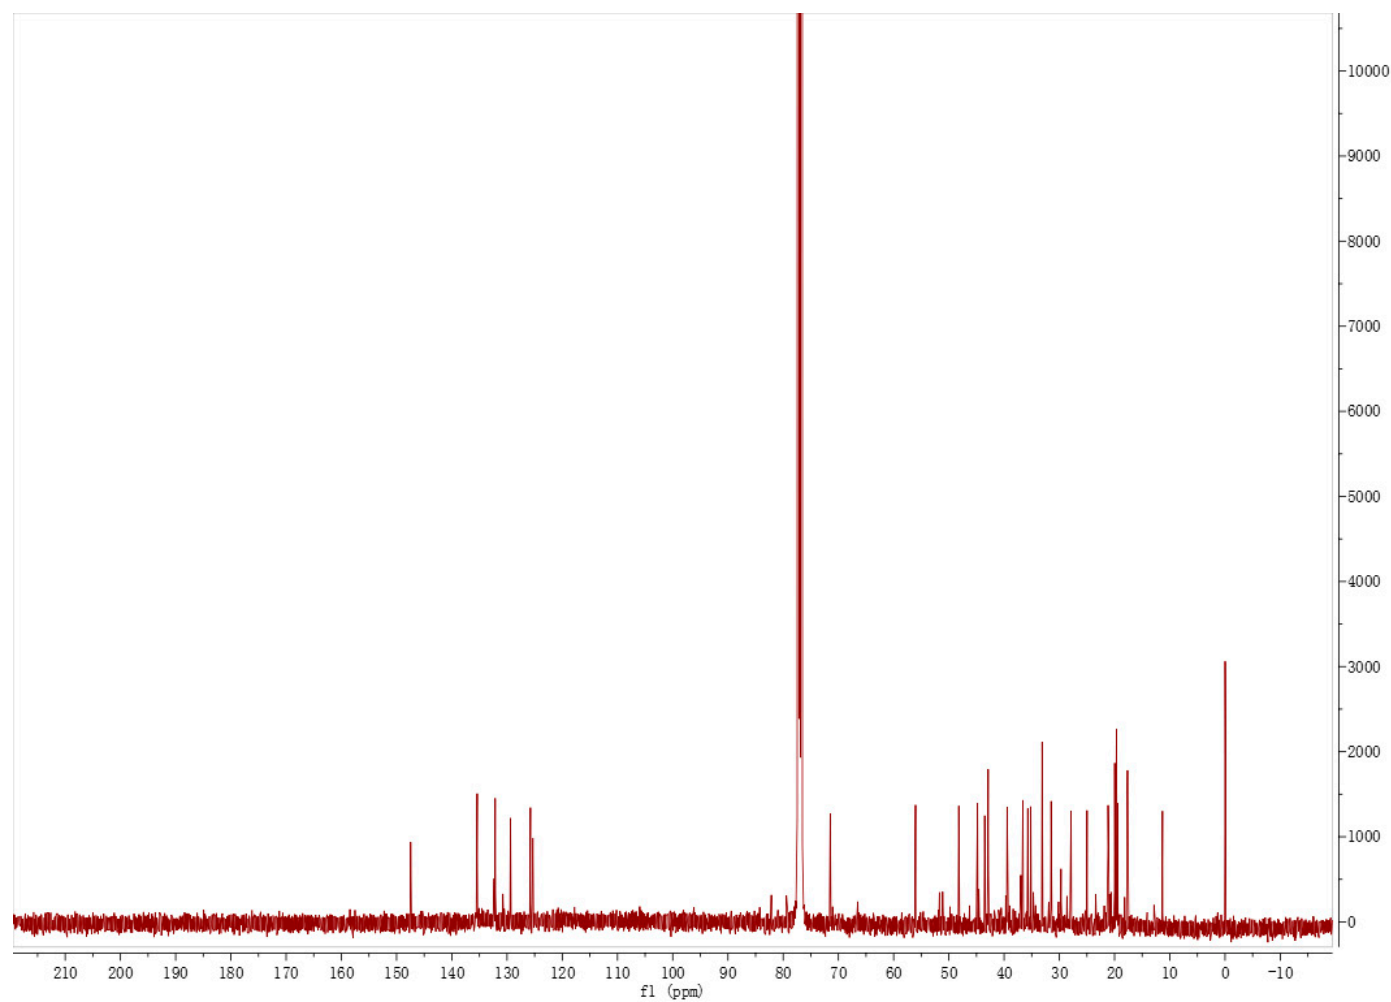

Figure S17:  $^{13}\text{C}$  NMR spectrum (100 MHz, Chloroform-d) of compound 4.

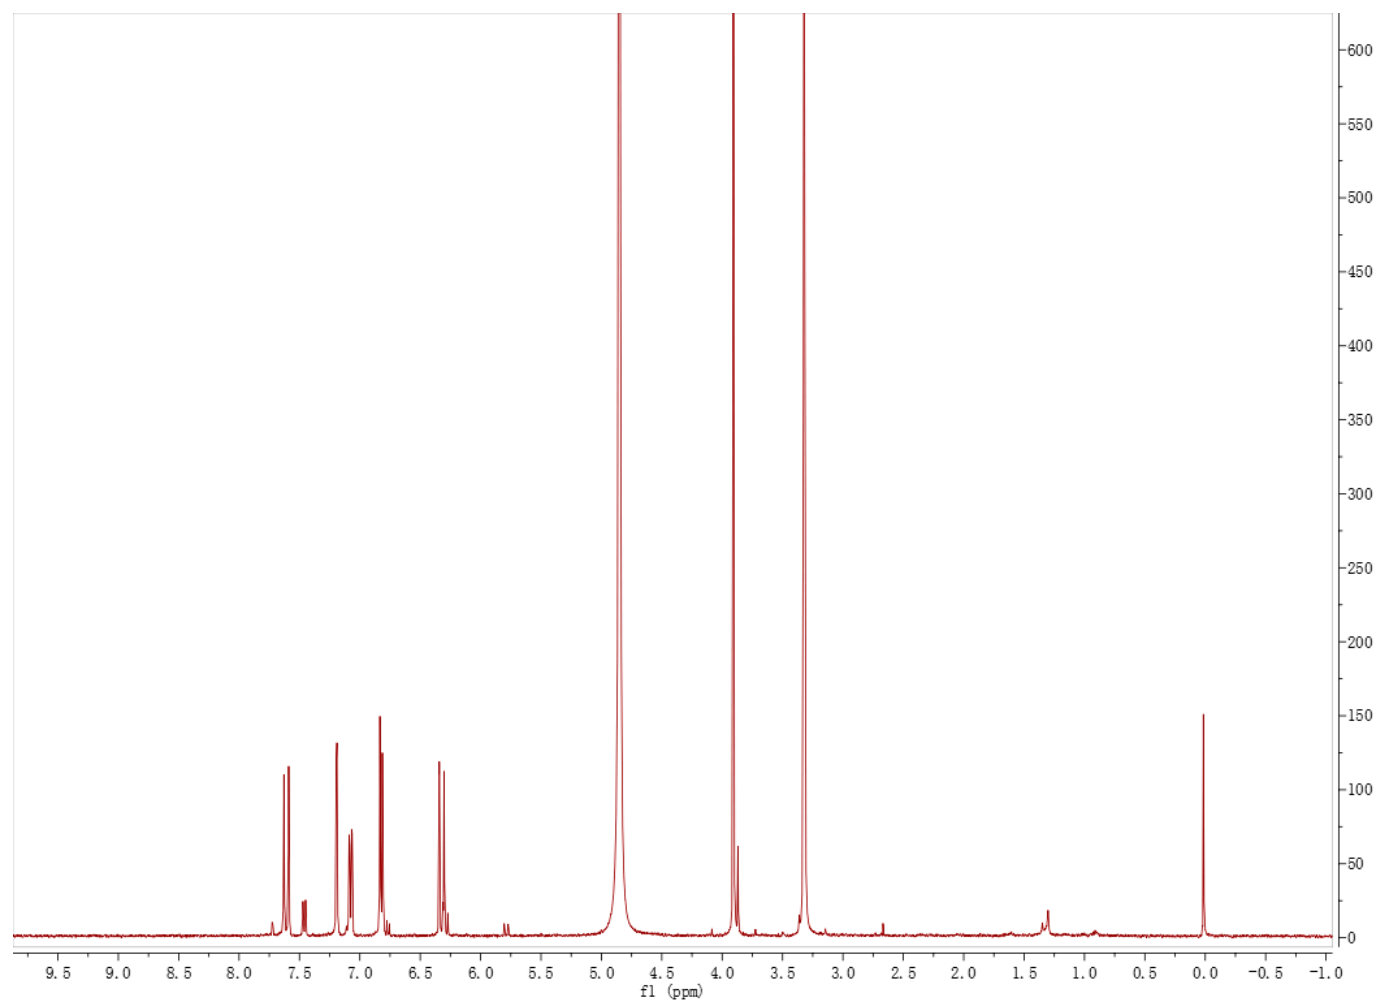

Figure S18:  $^1\text{H}$  NMR spectrum (400 MHz, Methanol- $\text{D}_4$ ) of compound 5.



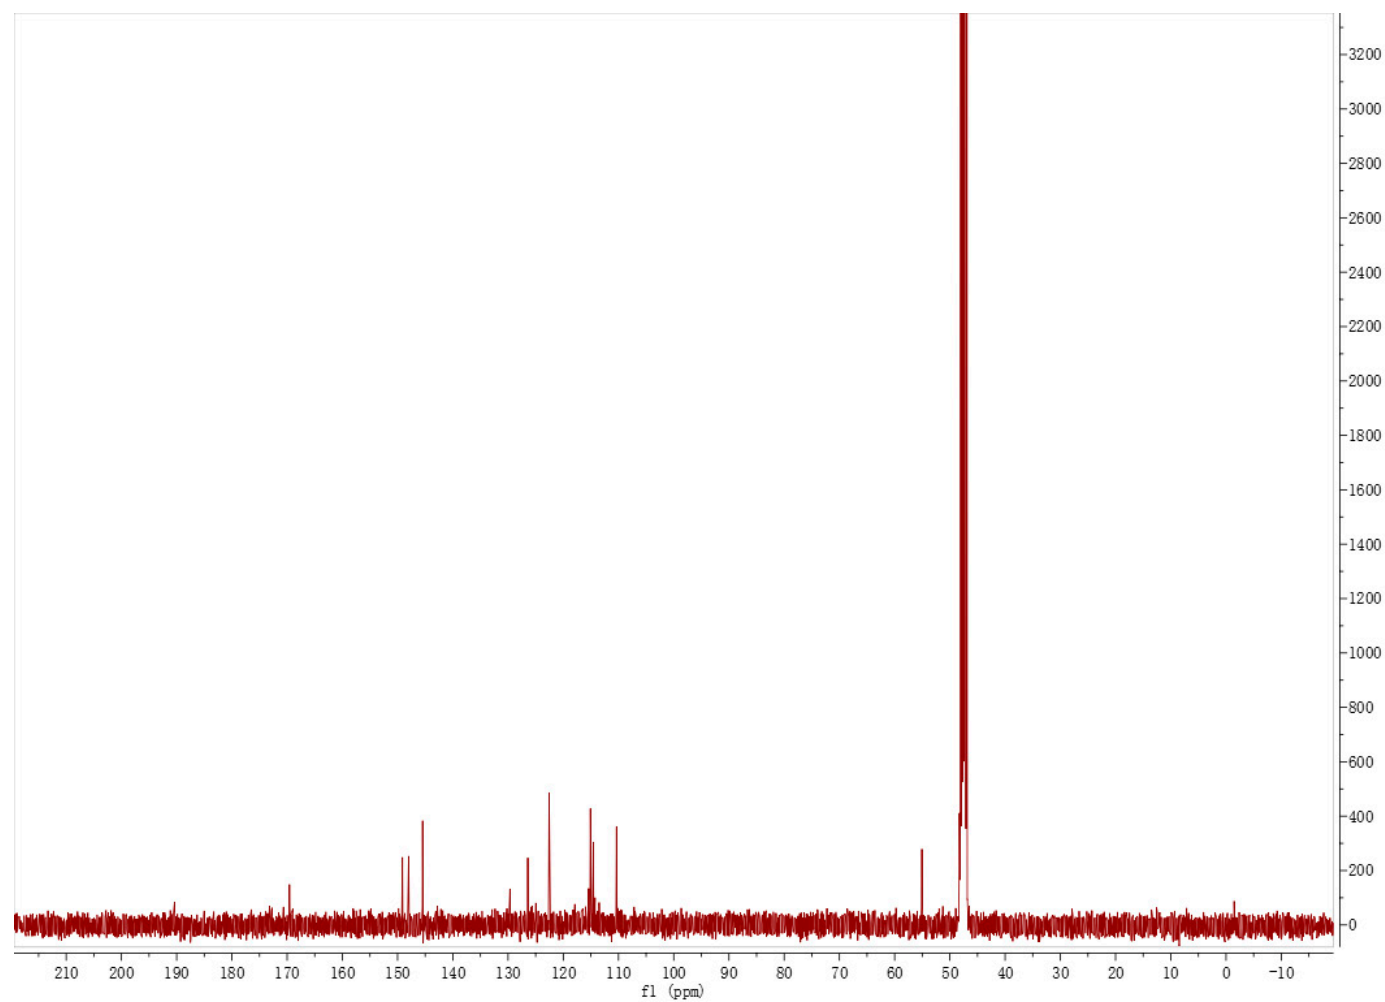

Figure S19:  $^{13}\text{C}$  NMR spectrum (100 MHz, Methanol-D4) of compound 5.

Table S5: Accession numbers of sequences used in the phylogenetic analyses.

| Taxa                                | Strain                | GenBank Accession Numbers |           |           |          |
|-------------------------------------|-----------------------|---------------------------|-----------|-----------|----------|
|                                     |                       | ITS                       | LSU       | SSU       | TEF      |
| <i>Chaetosphaeronema achilleae</i>  | MFLUCC 16-0476        | NR_153927                 | KX765266  |           |          |
| <i>Chaetosphaeronema hispidulum</i> | CBS 216.75            | KF251148                  | EU754144  | EU754045  |          |
| <i>Dematiopleospora cirsii</i>      | MFLUCC 15-0615        | KX274243                  | KX274250  |           | KX284708 |
| <i>Dematiopleospora fusiformis</i>  | MFLU 15-2133          | NR_157463                 | NG_069422 | NG_065662 |          |
| <i>Dermatiopleospora mariae</i>     | MFLUCC 13-0612        | KX274244                  | KJ749653  | KJ749652  | KJ749655 |
| <i>Dlhawksworthia alliariae</i>     | MFLUCC 13-0070        | KX494876                  | KX494877  | KX494878  |          |
| <i>Neostagonospora artemisiae</i>   | MFLUCC 17-0693        | MG828929                  | MG829038  | NG_063688 |          |
| <i>Nodulosphaeria guttulatum</i>    | MFLUCC 15-0069        | KY496746                  | KY496726  | KY501115  | KY514394 |
| <i>Nodulosphaeria multiseptata</i>  | MFLUCC 15-0078/IT1889 | KY496748                  | KY496728  | KY501116  | KY514396 |
| <i>Nodulosphaeria scabiosae</i>     | MFLUCC 14-1111        | KU708850                  | KU708846  | KU708842  | KU708854 |
| <i>Ophiobolus artemisiae</i>        | MFLUCC 14-1156        | KT315508                  | KT315509  | MG520979  | MG520905 |
| <i>Ophiobolus artemisiae</i>        | MFLU 15-1966          | MG520940                  | MG520960  | MG520978  | MG520904 |
| <i>Ophiobolus artemisiicola</i>     | MFLU 15-2137          | NR_157527                 | NG_059871 | NG_065147 | MG829220 |
| <i>Ophiobolus artemisiicola</i>     | MFLU 15-2140          | MG828931                  | MG829040  | MG829146  | MG829221 |
| <i>Ophiobolus disseminans</i>       | MFLUCC 17-1787        | MG520941                  | MG520961  | MG520980  | MG520906 |

|                                   |                |          |          |          |          |
|-----------------------------------|----------------|----------|----------|----------|----------|
| <i>Ophiobolus disseminans</i>     | MFLUCC 17-1790 | MG520942 | MG520962 | MG520981 | MG520907 |
| <i>Ophiobolus ponticus</i>        | MFLUCC 17-2273 | MG520943 | MG520963 | MG520982 | MG520908 |
| <i>Ophiobolus rossicus</i>        | MFLU 17-1639   | MG520944 | MG520964 | MG520983 | MG520909 |
| <i>Ophiobolus rudis</i>           | CBS 650.86     | KY090650 | GU301812 | AF164356 | GU349012 |
| <i>Ophiobolus senecionis</i>      | MFLUCC 13-0575 | KT728365 | KT728366 |          |          |
| <i>Ophiobolus malleolus</i>       | MFLUCC 15-1077 | MK356377 | MK356351 | MK356365 |          |
| <i>Paraophiobolus arundinis</i>   | MFLUCC 17-1789 | MG520945 | MG520965 | MG520984 | MG520912 |
| <i>Paraophiobolus plantaginis</i> | MFLUCC 17-0245 | KY797641 | KY815010 | KY815012 | MG520913 |
| <i>Pseudoophiobolus achilleae</i> | MFLU 17-0925   | MG520946 | MG520966 |          |          |
| <i>Pseudoophiobolus galii</i>     | MFLUCC 17-2257 | MG520947 | MG520967 | MG520989 | MG520926 |
| <i>Pseudoophiobolus italicus</i>  | MFLUCC 17-2255 | MG520948 | MG520968 | MG520990 | MG520927 |
| <i>Pseudoophiobolus mathieui</i>  | MFLUCC 17-1785 | MG520951 | MG520971 | MG520992 | MG520929 |
| <i>Paraphoma radicina</i>         | CBS 111.79     | KF251172 | KF251676 | EU754092 | GU349076 |
| <i>Ophiobolus hydei</i>           | YG-S81-1       | MK981300 | MK981300 | MK981300 | MK981300 |
| <i>Ophiobolus hydei</i>           | YG-S82-2       | MK981301 | MK981305 | MK981303 |          |
| <i>Macroventuria anomochaeta</i>  | CBS 525.71     | GU237881 | GU456315 | GU238208 | GU456262 |
